# Supplementary material for: Synthesis, structural characterization, DFT and molecular dynamics simulations of dinuclear (μ-hydroxo)-bridged triethanolamine copper(ii) complexes: efficient candidates towards visible light-mediated photo-Fenton degradation of organic dyes
Source: Royal Society of Chemistry journal article supplement (doi:10.1039/d4dt01463d), 2024-01-01
Supplement: d4dt01463d1.pdf [file d4dt01463d1.pdf]

## Synthesis, Structural characterization, DFT and Molecular Dynamics Simulations of Dinuclear ( $\mu$ -hydroxo) Bridged triethanolamine Copper (II) complexes: Efficient Candidates Towards Visible Light Mediated Photo-Fenton Degradation of Organic Dyes

Chetan Chauhan,<sup>a</sup> Tanuj,<sup>a</sup> Rajesh Kumar,<sup>a</sup> Jitendra Kumar,<sup>b</sup> Subhash Sharma,<sup>c</sup> Sam Benmansour,<sup>d\*</sup> Santosh Kumar,<sup>a\*</sup>

<sup>a</sup> Department of Chemistry, Himachal Pradesh University, Summer Hill, Shimla, India.

<sup>b</sup> Department of Chemistry. MLPK, College, Balrampur, UP, India

<sup>c</sup> CONAHCyT- Centro de Nanociencias y Nanotecnología. Universidad Nacional Autónoma de México, Km 107 Carretera Tijuana-Ensenada AP14, Ensenada, 22860, B.C, México.

<sup>d</sup> Departamento de Química Inorgánica, Edificio F Grupo M4 (Materiales moleculares Multifuncionales y Modulables) C/ Doctor Moliner, 50 46100-Burjassot, Spain

Corresponding Author: [santosh.chem88@gmail.com](mailto:santosh.chem88@gmail.com) (SK), [Sam.Ben@uv.es](mailto:Sam.Ben@uv.es) (SB).

### Supplementary Information

**Table S1:** Electrochemical data of complexes 1-3.

| Complex ID | E <sub>pa</sub> (V) | E <sub>pc</sub> (V) | I <sub>pc</sub> (A)     | I <sub>pa</sub> (A)     | I <sub>pa</sub> /I <sub>c</sub> | $\Delta E = E_{pa} - E_{pc}$ |
|------------|---------------------|---------------------|-------------------------|-------------------------|---------------------------------|------------------------------|
| Complex 1  | -1.1914             | -1.2207             | $3.21 \times 10^{-5}$   | $1.329 \times 10^{-5}$  | 1.56                            | +0.0293                      |
| Complex 2  | -0.6159             | -0.79031            | $-2.44 \times 10^{-5}$  | $4.4168 \times 10^{-5}$ | 1.810                           | +0.1744                      |
| Complex 3  | -0.72021            | -0.90332            | $-6.451 \times 10^{-5}$ | $3.317 \times 10^{-5}$  | 1.194                           | +0.1830                      |

**Table S2:** General surface information for complexes 1-3

| General surface information | Complex 1 | Complex 2 | Complex 3 |
|-----------------------------|-----------|-----------|-----------|
| Iso-value                   | 0.5       | 0.5       | 0.5       |
| Volume (Å <sup>3</sup> )    | 716.79    | 716.07    | 793.13    |
| Area (Å <sup>2</sup> )      | 574.22    | 577.45    | 645.00    |
| Globularity                 | 0.675     | 0.670     | 0.642     |
| Asphericity                 | 0.257     | 0.316     | 0.499     |

**Table S3:** Surface property information for complexes 1-3.

| Name (property)    | Complex 1 |       |       | Complex 2 |       |       | Complex 3 |       |       |
|--------------------|-----------|-------|-------|-----------|-------|-------|-----------|-------|-------|
|                    | Min       | Mean  | Max   | Min       | Mean  | Max   | Min       | Mean  | Max   |
| d <sub>i</sub> (Å) | 0.671     | 1.636 | 2.569 | 0.675     | 1.649 | 2.586 | 0.678     | 1.582 | 2.530 |

|                          |        |        |       |        |        |       |        |        |       |
|--------------------------|--------|--------|-------|--------|--------|-------|--------|--------|-------|
| <b>d<sub>c</sub> (Å)</b> | 0.757  | 1.643  | 2.526 | 0.757  | 1.648  | 2.662 | 0.767  | 1.590  | 2.397 |
| <b>d<sub>norm</sub></b>  | -0.707 | 0.479  | 1.417 | -0.701 | 0.448  | 1.206 | -0.697 | 0.482  | 1.367 |
| <b>Shape index</b>       | -0.997 | 0.183  | 0.998 | -0.994 | 0.193  | 0.996 | -1.000 | 0.182  | 0.998 |
| <b>Curvedness</b>        | -3.993 | -0.988 | 0.414 | -3.792 | -0.953 | 0.463 | -3.947 | -0.922 | 0.475 |

**Table S4:** Analysing the fingerprint based on the type of elements present, we calculate the ratio of the surface area where atoms interact closely, both within and outside the surface, in relation to the overall surface area.

|                  | <b>Inside atom</b> | <b>Outside atoms</b> |           |          |          |          |          |      |
|------------------|--------------------|----------------------|-----------|----------|----------|----------|----------|------|
|                  |                    | <b>Cu</b>            | <b>O</b>  | <b>F</b> | <b>H</b> | <b>N</b> | <b>C</b> |      |
| <b>Complex 1</b> | <b>C</b>           | 0                    | 0         | 0.6      | 6.0      | 0        | 3.7      | 10.2 |
|                  | <b>Cu</b>          | 0                    | 0         | 0        | 0        | 0        | 0        | 0.00 |
|                  | <b>F</b>           | 0                    | 0.8       | 2.8      | 11.7     | 0        | 0.5      | 15.7 |
|                  | <b>H</b>           | 0                    | 6.6       | 10.9     | 43.3     | 0        | 4.8      | 65.6 |
|                  | <b>N</b>           | 0                    | 0         | 0        | 0        | 0        | 0        | 0.00 |
|                  | <b>O</b>           | 0                    | 0         | 0.8      | 7.7      | 0        | 0        | 8.5  |
|                  |                    |                      | 0.00      | 7.4      | 15.1     | 68.7     | 0.00     | 8.9  |
| <b>Complex 2</b> | <b>Inside atom</b> | <b>Outside atoms</b> |           |          |          |          |          |      |
|                  |                    | <b>Cu</b>            | <b>Cl</b> | <b>O</b> | <b>H</b> | <b>N</b> | <b>C</b> |      |
|                  | <b>C</b>           | 0                    | 1.4       | 0        | 7.4      | 0        | 1.8      | 10.6 |
|                  | <b>Cl</b>          | 0                    | 1.1       | 0        | 9.2      | 0        | 1.4      | 11.7 |
|                  | <b>Cu</b>          | 0                    | 0         | 0        | 0        | 0        | 0        | 0.00 |
|                  | <b>H</b>           | 0                    | 5.7       | 7.6      | 50.9     | 0        | 5.0      | 69.3 |
|                  | <b>N</b>           | 0                    | 0         | 0        | 0        | 0        | 0        | 0.00 |
| <b>O</b>         | 0                  | 0                    | 0         | 8.5      | 0        | 0        | 8.5      |      |
|                  |                    | 0.00                 | 8.2       | 7.6      | 75.9     | 0.00     | 8.2      |      |
| <b>Complex 3</b> | <b>Inside atom</b> | <b>Outside atoms</b> |           |          |          |          |          |      |
|                  |                    | <b>Cu</b>            | <b>O</b>  | <b>H</b> | <b>N</b> | <b>C</b> |          |      |
|                  | <b>C</b>           | 0                    | 0.2       | 8.9      | 0        | 0        | 9.1      |      |
|                  | <b>Cu</b>          | 0                    | 0         | 0        | 0        | 0        | 0.00     |      |
|                  | <b>H</b>           | 0                    | 8.7       | 65.9     | 0        | 6.5      | 81.1     |      |
|                  | <b>N</b>           | 0                    | 0         | 0        | 0        | 0        | 0.00     |      |
|                  | <b>O</b>           | 0                    | 0.1       | 9.5      | 0        | 0.2      | 9.8      |      |
|                  |                    | 0.00                 | 9.0       | 84.3     | 0.00     | 6.7      |          |      |

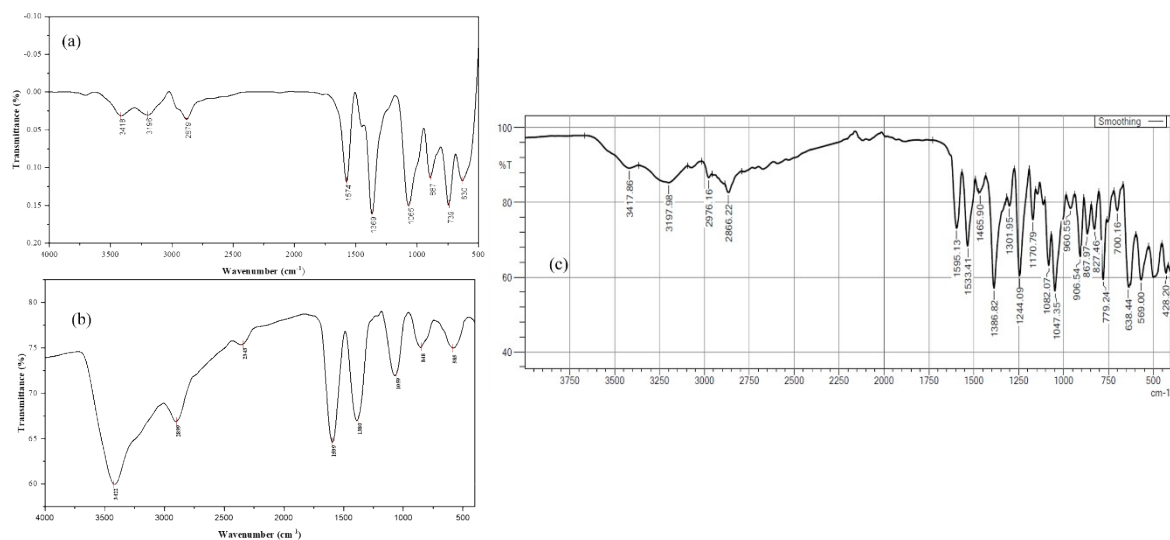

**Figure S1:** IR spectra of complexes 1-3 (a-c)

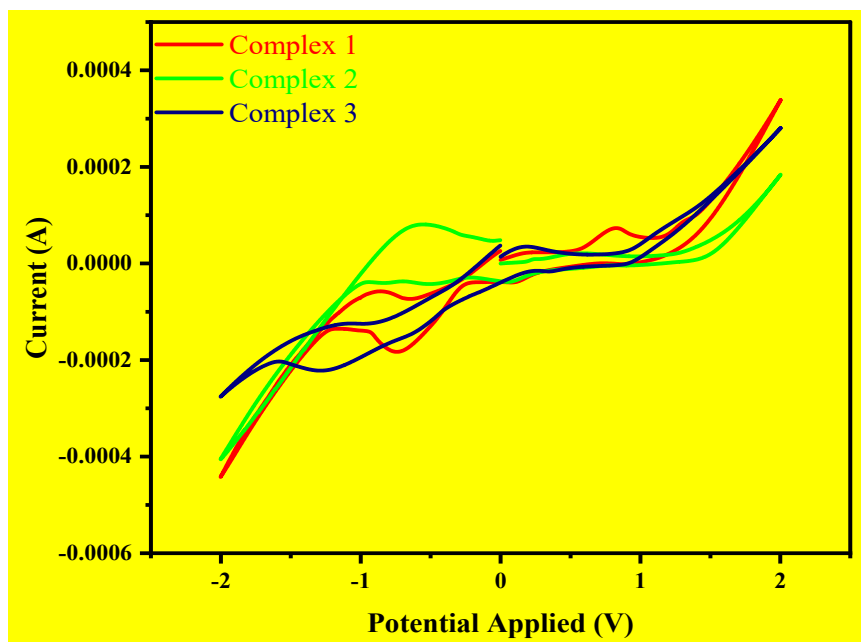

**Figure S2:** Electrochemical behaviour of complexes 1-3

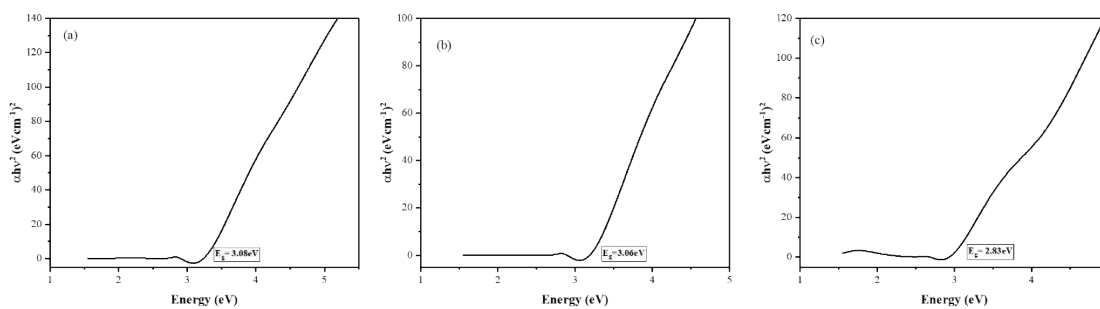

**Figure S3:** Tauc's plot of the complexes 1-3 (a-c) calculated using UV-Vis spectroscopy

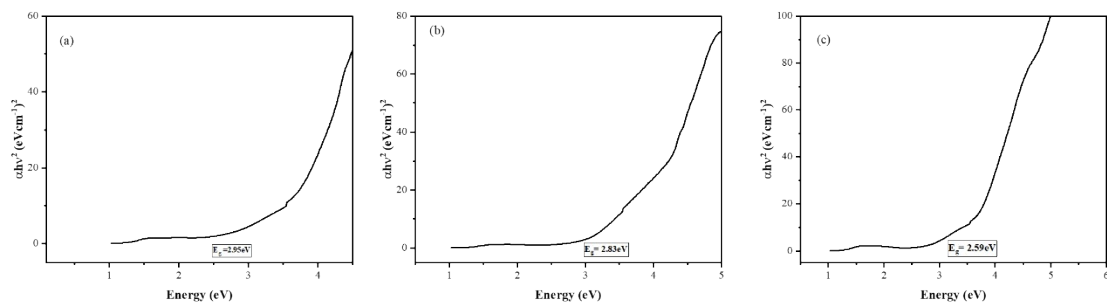

**Figure S4:** Tauc's plot of the complexes 1-3 (a-c) calculated using DRS

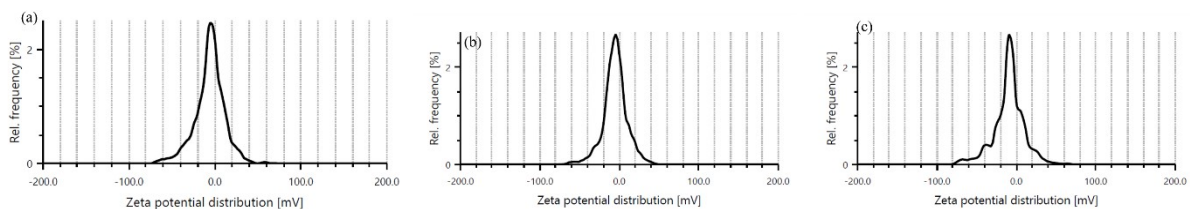

**Figure S5:** Zeta potential for complexes 1-3 (a-c)

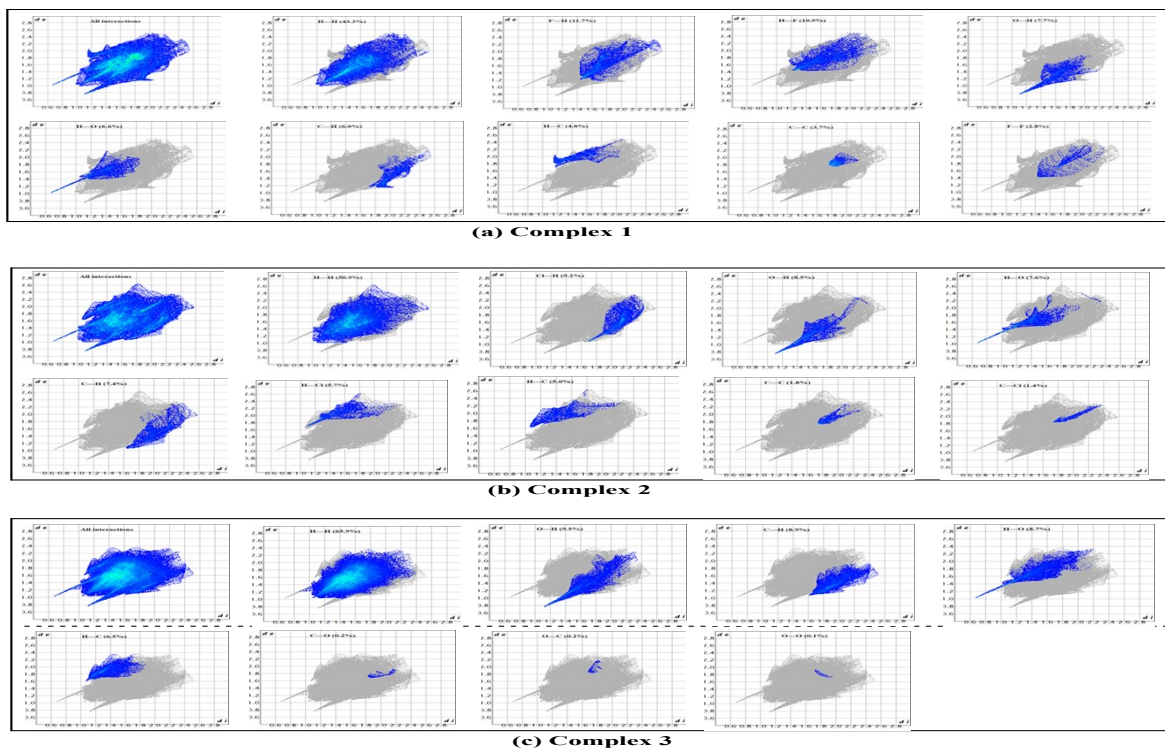

**Figure S6:** Fingerprint diagrams depicting different non-covalent interactions within single crystals of complexes **1-3**.

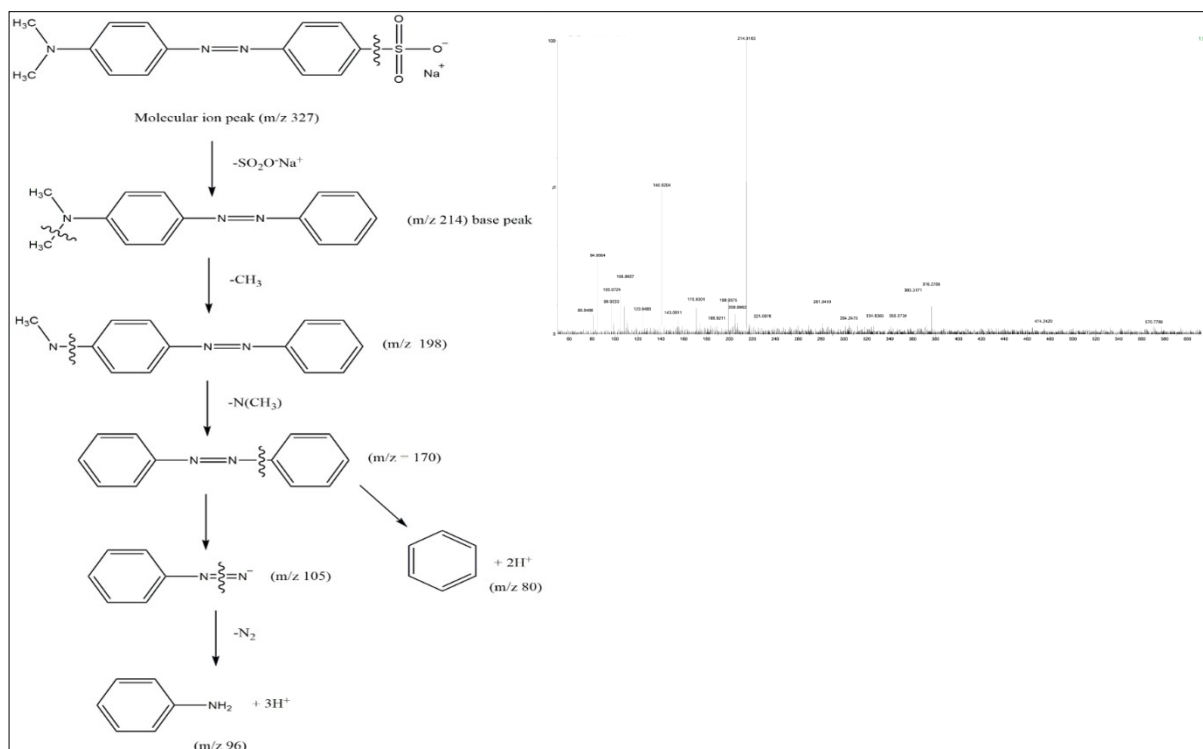

**Figure S7:** Degradation pattern of MO by complex **3** interpreted through mass spectra

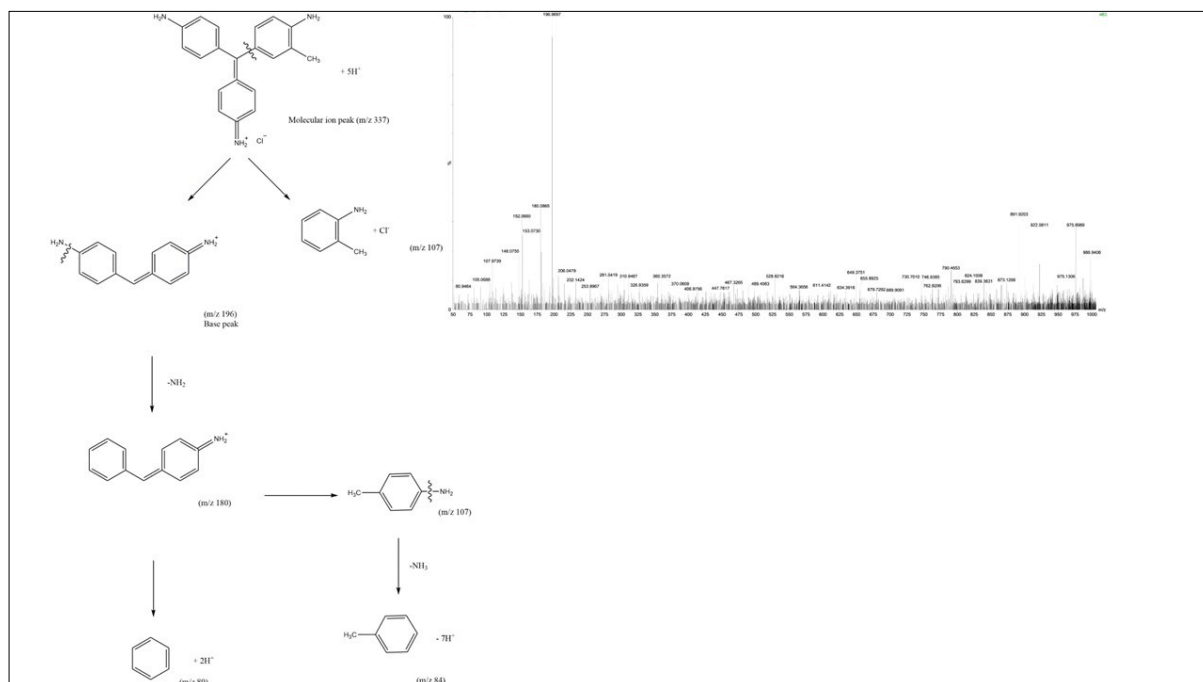

**Figure S8:** Degradation pattern of FB by complex **3** interpreted through mass spectra.

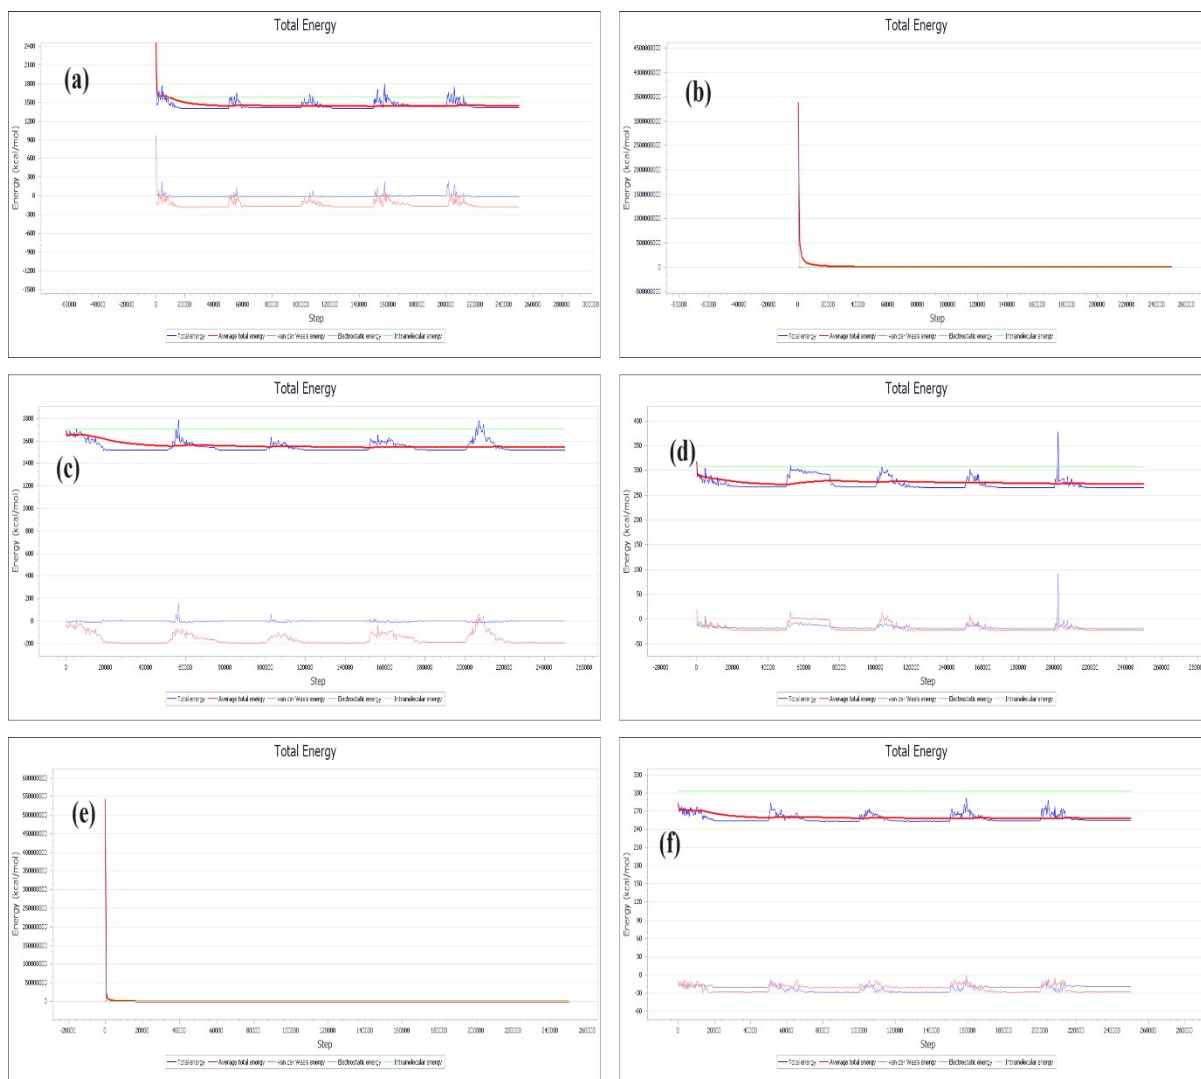

**Figure S9:** Total energy distribution for (a) MO/complex 1, (b) MO/complex 2, (c) MO/complex 3, (d) FB/complex 1, (e) FB/complex 2, (f) FB/complex 3.

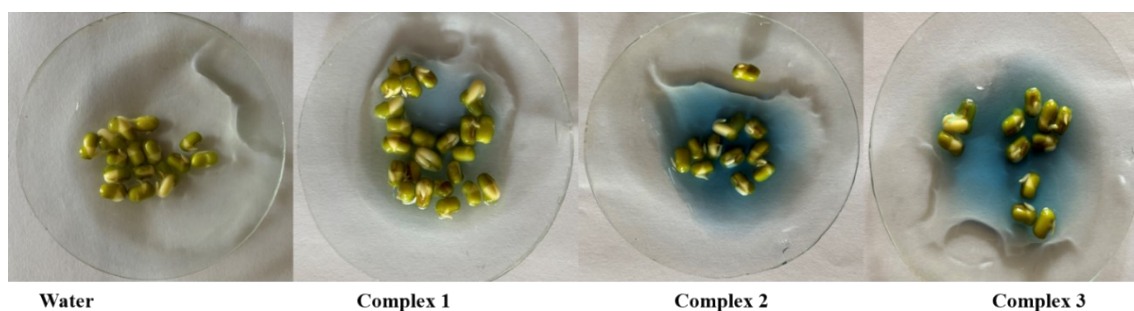

**Figure S10:** Phytotoxicity assessment: seed germination assay of *Vigna radiata* with complexes 1-3.
